# Supplementary material for: Potential Prognostic Markers for Relapsed/Refractory vs. Responsive Acute Myeloid Leukemia
Source: MDPI journal article supplement (doi:10.3390/cancers14112752), 2022-06-01

**Supplementary Table S1.** Diagnosis and treatment strategies of AML patients. Response evaluation was based on the European Leukemia Network (ELN) 2017 recommendations.

| Patient No.                                 | Diagnosis                    | Molecular Genetics     | Karyotype | ELN2017 risk group | Treatment and best response                                                  | Disease status |
|---------------------------------------------|------------------------------|------------------------|-----------|--------------------|------------------------------------------------------------------------------|----------------|
| <b>Treatment responsive patients (n=15)</b> |                              |                        |           |                    |                                                                              |                |
| 1                                           | APL                          | FLT3-ITD, PML-RARA     | t(15;17)  | Favorable          | PETHEMA/HOVON LPA 2005: AIDA induction + Consolidation + Maintenance – CRm.  | CRm            |
| 2                                           | APL                          | FLT3-ITD, PML-RARA     | t(15;17)  | Favorable          | NA                                                                           | CRm            |
| 3                                           | APL                          | FLT3-ITD, PML-RARA     | t(15;17)  | Favorable          | PETHEMA/HOVON LPA 2005: AIDA induction + Consolidation + Maintenance – CRm.  | CRm            |
| 4                                           | AML, not otherwise specified | NPM1, FLT3-ITD         | Normal    | Intermediate       | 7+3 induction - CRm. MUD alloSCT                                             | CRm            |
| 5                                           | AML, not otherwise specified | NPM1, FLT3-ITD, IDH2   | Normal    | Favorable          | 7+3 induction - CR MUD HLA10/10 alloSCT - CRm was confirmed.                 | CRm            |
| 6                                           | AML, not otherwise specified | FLT3-ITD, IDH2, DNMT3A | Normal    | Adverse            | 7+3 - RD FLAG-Ida - CR. MRD alloSCT Maintenance with Midostaurin, Sorafenib. | CRm            |
| 7                                           | De Novo AML, NOS             | IDH2                   | Normal    | Intermediate       | 7+3 induction - CR 2 cycles of HD AraC MUD alloSCT.                          | CR             |
| 8                                           | AML-MRC, secondary post MDS  | IDH2                   | Normal    | Intermediate       | 7+3 – RD FLAG-Ida - CR. MUD alloSCT.                                         | CR             |
| 9                                           | AML-MRC, secondary post MDS  | None                   | Normal    | Intermediate       | 7+3 induction - CR. MRD alloSCT                                              | CR             |
| 10                                          | AML-MRC, secondary post MDS  | None                   | Normal    | Intermediate       | 7+3 induction - CR 1 cycle of HD AraC + Daunorubicin Haploidentical alloSCT. | CR             |

|                                             |                                                    |                 |                                         |              |                                                                                                                                            |    |
|---------------------------------------------|----------------------------------------------------|-----------------|-----------------------------------------|--------------|--------------------------------------------------------------------------------------------------------------------------------------------|----|
| 11                                          | De Novo AML, NOS.                                  | IDH2            | Normal                                  | Intermediate | 7+3 - RD,<br>FLAG-Ida - CR<br>MUD alloSCT.                                                                                                 | CR |
| 12                                          | De Novo AML with recurrent genetic abnormalities   | None            | t(8;21)(q22;q22), AML1/ETO              | Favorable    | 7+3 – RD<br>HDaraC +<br>Daunorubicin – CR.                                                                                                 | CR |
| 13                                          | De Novo AML with recurrent genetic abnormalities   | NPM1, FLT3-ITD  | Normal                                  | Intermediate | 7+3 induction – CR<br>1 cycle of HDaraC +<br>Daunorubicin<br>MUD alloSCT.                                                                  | CR |
| 14                                          | AML-MRC, secondary post MDS                        | SF3B1           | Complex (del 5q, 19p, dup 3q)           | Adverse      | FLAG-Ida induction - CR                                                                                                                    | CR |
| 15                                          | De Novo AML with recurrent genetic abnormalities   | NPM1            | Normal                                  | Favorable    | 7+3 induction – CR<br>1 cycle of HDaraC +<br>Daunorubicin<br>Autologous SCT.                                                               | CR |
| <b>Treatment refractory patients (n=16)</b> |                                                    |                 |                                         |              |                                                                                                                                            |    |
| 16                                          | AML, not otherwise specified                       | FLT3-ITD, ASXL1 | Normal                                  | Adverse      | Decitabine + Ibrutinib - RD.<br>Low Dose Cytarabine - PD                                                                                   | RD |
| 17                                          | Secondary AML, with myelodysplasia related changes | FLT3-ITD        | Trisomy 14                              | Adverse      | Decitabine + Ibrutinib - RD.<br>7+3 - RD                                                                                                   | RD |
| 18                                          | AML, not otherwise specified                       | FLT3-ITD        | Normal                                  | Intermediate | 7+3 induction - PR<br>HDaraC +<br>Daunorubicin –<br>response was not evaluated, death in aplasia.                                          | PR |
| 19                                          | AML-MRC, secondary post MDS                        | NPM1, TET2      | Normal                                  | Favorable    | Decitabine - RD<br>ACTIVE - CR<br>Palliation therapy<br>LDaraC + Glasdegib for relapsed disease - PD                                       | PD |
| 20                                          | AML-MRC, secondary post MDS                        | TP53, DNMT3A    | Complex (del 5q, 7p, 13q, 16p, 17p, +8) | Adverse      | 7+3 - CR.<br>MUD alloSCT.<br>ACTIVE treatment for relapsed disease - CR.<br>Palliation with<br>LDaraC + Glasdegib for second relapse – PD. | PD |

|    |                                 |                                 |                                               |              |                                                                                                                               |      |
|----|---------------------------------|---------------------------------|-----------------------------------------------|--------------|-------------------------------------------------------------------------------------------------------------------------------|------|
| 21 | AML-MRC                         | PTPN11, CUX1, SMC3, CBL, RUNX1; | del(11p), 11q23 MLL (KMT2A) rearrangement     | Adverse      | 7+3 - RD, HDAraC + Daunorubicin - CR. MRD alloSCT. ACTIVE for relapsed disease - RD. Palliation with LD AraC + Glasdegib - PD | PD   |
| 22 | AML-MRC, secondary post MDS     | TET2                            | Normal                                        | Intermediate | Decitabine - RD. ACTIVE – MLFS was achieved, death in aplasia.                                                                | MLFS |
| 23 | AML-MRC, secondary post MDS     | None                            | del(5q)                                       | Adverse      | Decitabine - RD. ACTIVE - CRi                                                                                                 | CRi  |
| 24 | AML-MRC, secondary post MDS     | None                            | del(3p), del(5q), del(9q), del(12q), del(17p) | Adverse      | FLAG-Ida - RD<br>ACTIVE - RD<br>Decitabine + Venetoclax - RD<br>LD AraC + Glasdegib - RD                                      | RD   |
| 25 | AML-MRC, secondary post MDS     | ASXL1, IDH1                     | Normal                                        | Adverse      | 7+3 - RD, HD AraC - RD<br>ACTIVE - RD                                                                                         | RD   |
| 26 | AML, secondary, therapy related | ASXL1, NRAS                     | Normal                                        | Adverse      | 7+3 - RD, FLAG-Ida - RD<br>ACTIVE - RD<br>LD AraC + Glasdegib - CR.<br>MUD alloSCT.                                           | CR   |
| 27 | AML-MRC, secondary post MDS     | WT1, PTPN11                     | del(7q)                                       | Adverse      | Decitabine - RD. FLAG-Ida - CRi. MUD alloSCT<br>LD AraC + Venetoclax for relapse - PD                                         | PD   |
| 28 | AML-MRC                         | None                            | del(7q)                                       | Adverse      | 7+3 - RD<br>LD AraC + Venetoclax - MLFS was achieved, death in aplasia                                                        | MLFS |
| 29 | AML-MRC                         | KIT, KRAS                       | -7, dup(3q)                                   | Adverse      | 7+3 - RD, FLAG-Ida - RD<br>Actinomycin D + Venetoclax - RD<br>Decitabine + Venetoclax - RD<br>Sorafenib - RD                  | RD   |
| 30 | AML-MRC, secondary post MDS     | TP53                            | Complex (48,XX,+1,+8,+11,-6,del(5q))          | Adverse      | 7+3 - RD, HD AraC + Daunorubicin - RD. Salvage LD AraC + Venetoclax - CR<br>MUD alloSCT                                       | CR   |
| 31 | AML-MRC, secondary post MDS     | PTPN11, EZH2, RUNX1             | dup(15q), LOH(q11)                            | Adverse      | 7+3 - RD<br>FLAG-Ida - RD<br>Actinomycin D + Venetoclax, 2 cycles - RD                                                        | RD   |

**Abbreviations:** ACTIVE – low dose cytarabine, actinomycin D, venetoclax; AlloSCT – allogeneic stem cell transplantation; AIDA induction – Idarubicin, ATRA; AML – acute myeloid leukemia; AML-MRC – acute myeloid

leukemia with myelodysplasia related changes; AML NOS – acute myeloid leukemia not otherwise specified; APL – acute promyelocytic leukemia; CR – complete remission; CRi – complete remission with incomplete hematological recovery; CRm – complete remission with negative minimal residual disease by multicolored flow cytometry; FLAG-Ida – Fludarabine, Cytarabine, Idarubicin, G-CSF; HDArC – high dose Cytarabine; HLA – human leucocyte antigen; LDArC – low dose cytarabine; MDS – myelodysplastic syndrome; MLFS – morphological leukemia free state; MRD – matched related donor; MUD – matched unrelated donor; NA – information not available; PD – progressive disease; PR – partial remission; RD – refractory disease; 7+3: cytarabine and daunorubicin.

**Supplementary Table S2.** Primers used for RT-qPCR analysis

| Gene           | Forward and reverse primers                                   |
|----------------|---------------------------------------------------------------|
| <i>ABCB1</i>   | F: GTCTGGACAAGCACTGAAA<br>R: AACAAACGGTTCGGAAGTTT             |
| <i>APAF1</i>   | F: GGCTGTGGGAAGTCTGTATTAGC<br>R: ACTCTCATCCTGATCCAACCG        |
| <i>BAK1</i>    | F: TCATCGGGGACGACATCAAC<br>R: CAAACAGGCTGGTGGCAATC            |
| <i>BAX</i>     | F: TGCCTCAGGATGCGTCCACCAA<br>R: CCCCAGTTGAAGTTGCCGTCAG        |
| <i>BCL2</i>    | F: CGGAGGCTGGGATGCCTTTG<br>R: TTTGGGGCAGGCATGTTGAC            |
| <i>BCL2A1</i>  | F: TTACAGGCTGGCTCAGGACT<br>R: AGCACTCTGGACGTTTTGCT            |
| <i>BCL2L1</i>  | F: TGCATTGTTCCCATAGAGTTCCA<br>R: CCTGAATGACCACCTAGAGCCTT      |
| <i>BCL2L2</i>  | F: CTTGGTCTTGTTGTGAGTATGC<br>R: TGGAGCCGATGGTCTAGTC           |
| <i>BECN1</i>   | F: CTCCCGAGGTGAAGAGCATC<br>R: GCTGTTGGCACTTTCTGTGG            |
| <i>DAPK1</i>   | F: CAAGACAGGCACGGCAATAC<br>R: GGCTCCCATCAGACAGAGATAC          |
| <i>DNMT1</i>   | F: ACCGCTTCTACTTCCTCGAGGCCTA<br>R: GTTGCAGCTCTCTGTGAACACTGTGG |
| <i>DNMT3A</i>  | F: CAGCGTCACACAGAAGCATATCC<br>R: GGTCTCACTTTGCTGAACCTTGG      |
| <i>EZH2</i>    | F: GTGGAGAGATTATTTCTCAAGATG<br>R: CCGACATACTTCAGGGCATCAGCC    |
| <i>GAPDH</i>   | F: AGTCCCTGCCCACTCAG<br>R: TACTTTATTGATGGTACATGACAAGG         |
| <i>GATAD2A</i> | F: GACGGAGACATGAGGGTGAC<br>R: CGTTGTCTGGAGAGCACAATCA          |
| <i>HDAC1</i>   | F: CAAGCTCCACATCAGTCCTTCC<br>R: TGCGGCAGCATTCTAAGGTT          |
| <i>HDAC2</i>   | F: AGTCAACGAGGCGGCAAAA<br>R: TGCGGATTCTATGAGGCTTCA            |
| <i>IDH1</i>    | F: TTGGCTGCTTGCAATTAAGGTT<br>R: GTTTGGCCTGAGCTAGTTTGA         |
| <i>IDH2</i>    | F: GCTGGAGAAGGTGTGCGTG<br>R: TGTTCAAGGAAGTGCTCGTTTCA          |
| <i>KAT2A</i>   | F: CAGTTTCGGCAGAGGTCTCA<br>R: ATGAGTGGTTTCGTAGCGGG            |
| <i>KAT2B</i>   | F: CGAATCGCCGTGAAGAAAGC<br>R: CTTGCAGGCGGAGTACACT             |
| <i>KAT6A</i>   | F: TGTCAGTTTGGGGCATCTCC<br>R: TCTTATGCCGGGAGGAAGGA            |
| <i>KDM6B</i>   | F: TTCCTGTGTACCGCTTCGTG<br>R: AGCTGGTACTGATAGGCGGT            |

|                     |                                                                 |
|---------------------|-----------------------------------------------------------------|
| <i>MCL1</i>         | F: GTGCCTTTGTGGCTAAACACT<br>R: AGTCCCGTTTTGTCCTTACGA            |
| <i>MYC</i>          | F: AATGAAAAGGCCCCCAAGGTAGTTATCC<br>R: GTCGTTTCCGCAACAAGTCCTCTTC |
| <i>MTA1</i>         | F: AGCTACGAGCAGCACACGCGGT<br>R: CACGCTTGGTTCCGAGGAT             |
| <i>MTA2</i>         | F: TGTACCGGGTGGGAGATTAC<br>R: TGAGGCTACTAGAAATGTCCCTG           |
| <i>CDKN1A (p21)</i> | F: GGCAGACCAGCATGACAGATT<br>R: GCGGATTAGGGCTTCCTCT              |
| <i>P53</i>          | F: TAACAGTTCCTGCATGGGCGGC<br>R: AGGACAGGCACAAACACGCACC          |
| <i>SIN3A</i>        | F: ACAGAAAGAGGAGAATTCGGATG<br>R: CGCTCCACGTAGTCTGACC            |
| <i>TET1</i>         | F: TTCGTCACTGCCAACCTTAG<br>R: ATGCCTCTTCACTGGGTG                |
| <i>TET2</i>         | F: CCCTTCTCCGATGCTTTCTG<br>R: TGGGTTATGCTTGAGGTGTTT             |
| <i>TET3</i>         | F: TCCAGCAACTCCTAGAACTGAG<br>R: AGGCCGCTTGAATACTGACTG           |
| <i>TGFBR1</i>       | F: CACAGAGTGGGAACAAAAAGGT<br>R: CCAATGGAACATCGTCGAGCA           |
| <i>WT1</i>          | F: GGCATCTGAGACCAGTGAGAA<br>R: GAGAGTCAGACTTGAAAGCAGT           |

**Supplementary Figure S1.** Gene expression analysis in treatment responsive and refractory AML patients. Cell samples were collected at diagnosis stage and after treatment. Relative gene expression analysis was performed using RT-qPCR  $\Delta\Delta C_t$  method; GAPDH was used as a “housekeeping” gene. Mean  $\pm$  standard deviation is presented, grey data points indicate outliers. Mann-Whitney U test was used to determine the significance of difference between groups of different patients’ samples, and significance was set at  $P \leq 0.05$  (\*). Outliers were determined by ROUT ( $Q = 5\%$ ).

## Cell cycle regulation

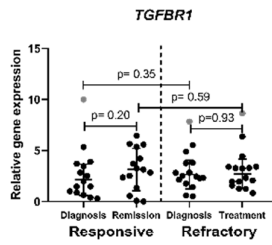

## Drug pump

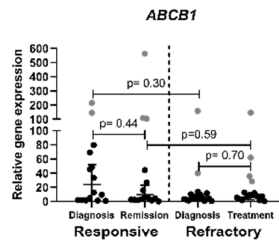

## Autophagy

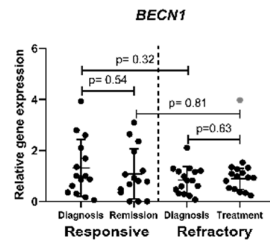

## Metabolism

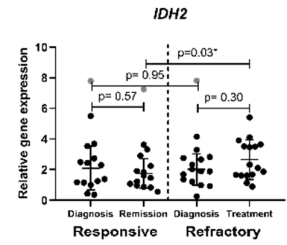

## Anti-apoptotic

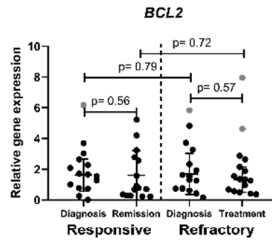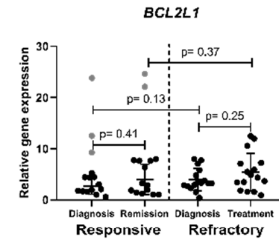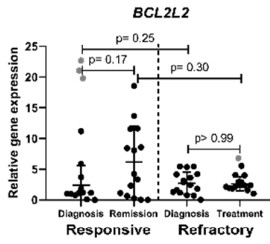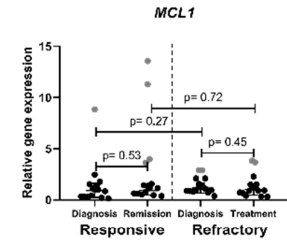

## Pro-apoptotic

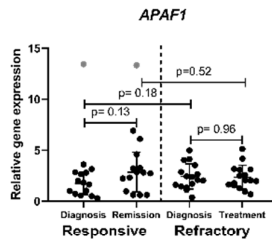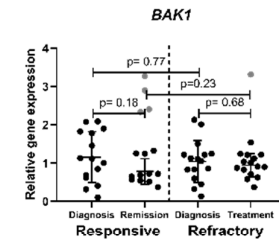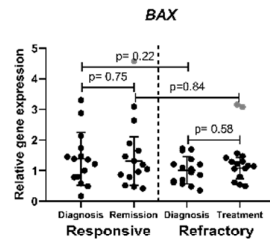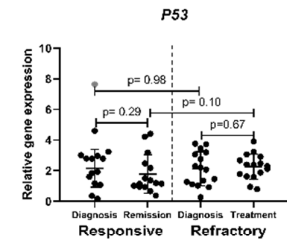

## Epigenetic

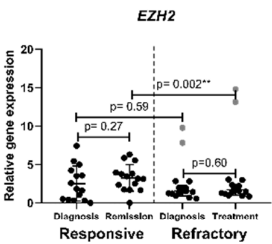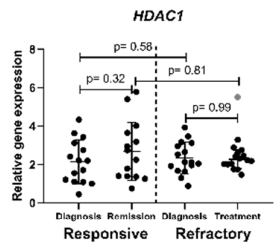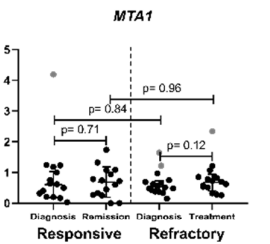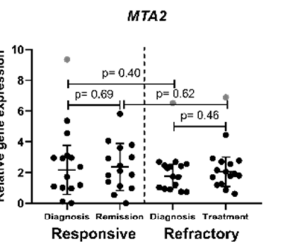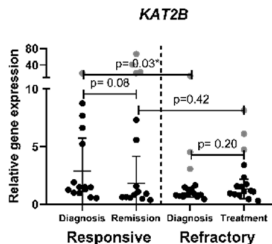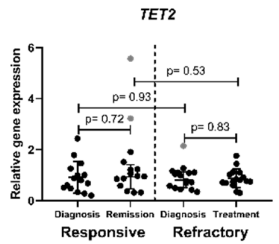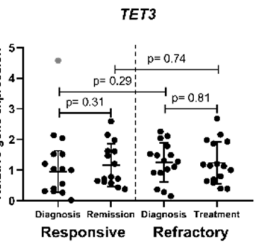

Supplement: s1 [file s1]
